# Supplementary material for: Outcomes in Guideline‐Based Class I Indication Versus Earlier Referral for Surgical Myectomy in Hypertrophic Obstructive Cardiomyopathy
Source: PubMed Central journal article supplement — J Am Heart Assoc. 2020 Dec 21;10(1):e016210. doi: 10.1161/JAHA.120.016210 (PMC7955478; doi:10.1161/jaha.120.016210), 2020-12-21
Supplement: JAH3-10-e016210-s001.pdf [file JAH3-10-e016210-s001.pdf]

# **Supplemental Material**

## **Data S1.**

### **Surgical details**

The type of cardiac surgeries was as follows: isolated myectomy (n=1248, 55%), myectomy plus mitral/subvalvular apparatus surgery (n=799, 35%), myectomy plus coronary artery bypass grafting (n=153, 7%) and myectomy plus coronary artery bypass plus mitral/subvalvular apparatus surgery (n=69, 3%). The different additional mitral procedures were as follows: plication of the A2 scallop of the mitral valve (n=312, 14%), papillary muscle reorientation (n=174, 8%), papillary muscle resection (n=123, 5%), resection of cordae tendinae causing LVOT obstruction (n=209, 9%), Alfieri stitch (n=40, 2%) and mitral valve replacement (n=109, 5%). As discussed above, only in 5% patients where additional procedures did not relieve LVOT obstruction, the decision was made to replace the mitral valve. The mean basal septal thickness in patients with concomitant mitral procedures was  $1.8 \pm 0.3$  vs.  $2.3 \pm 0.4$  cm in those with isolated myectomy ( $p < 0.001$ ). Similarly, the amount of myocardium removed during septal myectomy was significantly lower in the subgroup with concomitant mitral procedures vs. those with isolated myectomies ( $6.1 \pm 3$  g vs.  $8.9 \pm 4$  g,  $p < 0.001$ ).

**Table S1. Univariable Cox Proportional Hazard analysis for primary composite endpoints (all-cause death and appropriate ICD discharge).**

| <b>Variable</b>                                                                          | <b>HR [95% CI]</b> | <b>p-value</b> |
|------------------------------------------------------------------------------------------|--------------------|----------------|
| <b>Age (for every 10 year increase)</b>                                                  | 1.67 [1.41-1.76]   | <0.001         |
| <b>Female sex</b>                                                                        | 1.51 [1.18-1.89]   | 0.001          |
| <b>Family history of HCM</b>                                                             | 1.10 [0.73-1.78]   | 0.6            |
| <b>Family history of SCD</b>                                                             | 1.04 [0.71-1.59]   | 0.8            |
| <b>History of SCD</b>                                                                    | 1.03 [0.51-2.06]   | 0.9            |
| <b>History of NSVT</b>                                                                   | 1.37 [0.81-2.41]   | 0.3            |
| <b>History of hypertension</b>                                                           | 1.89 [0.91-3.86]   | 0.3            |
| <b>History of diabetes mellitus</b>                                                      | 1.33 [0.89-2.03]   | 0.3            |
| <b>History of smoking</b>                                                                | 1.39 [0.95-1.96]   | 0.3            |
| <b>History of obstructive CAD</b>                                                        | 2.09 [1.54-2.69]   | <0.001         |
| <b>Syncope</b>                                                                           | 1.13 [0.74-1.74]   | 0.5            |
| <b>Medical therapy for symptomatic relief of LVOT obstruction</b>                        | 1.04 [0.80-1.37]   | 0.8            |
| <b>5-year European SCD risk score</b>                                                    | 1.01 [0.92-1.09]   | 0.8            |
| <b>Left ventricular ejection fraction</b>                                                | 1.04 [0.98-1.12]   | 0.8            |
| <b>Indexed left atrial diameter</b>                                                      | 1.05 [0.86-1.31]   | 0.61           |
| <b>Maximal basal interventricular septal thickness</b>                                   | 1.03 [0.75-1.41]   | 0.9            |
| <b>Resting LVOT gradient (for 10 mm Hg increase)</b>                                     | 1.01 [0.96-1.05]   | 0.6            |
| <b>Maximal LVOT gradient (for 10 mm Hg increase)</b>                                     | 1.03 [0.99-1.06]   | 0.2            |
| <b>Class I indication vs. earlier indication for surgical relief of LVOT obstruction</b> | 2.21 [1.69-2.98]   | <0.001         |
| <b>Type of surgical relief of LVOT obstruction</b>                                       |                    |                |
| <b>Myectomy</b>                                                                          | Reference          |                |
| <b>Myectomy + mitral/subvalvular surgery</b>                                             | 1.10 [0.51-2.41]   | 0.5            |
| <b>Myectomy + CABG</b>                                                                   | 1.12 [0.50-2.41]   | 0.5            |
| <b>Myectomy + CABG + mitral/subvalvular surgery</b>                                      | 1.32 [0.61-3.01]   | 0.4            |

HCM=hypertrophic cardiomyopathy, SCD=sudden cardiac death, CAD=coronary artery disease, LVOT=left ventricular outflow tract, CABG=coronary artery bypass grafting, HR=hazard ratio, CI=confidence interval

**Table S2. Univariable competing risk analysis for secondary composite endpoints (deaths excluding documented noncardiac deaths).**

| <b>Variable</b>                                                                          | <b>sHR [95% CI]</b> | <b>p-value</b> |
|------------------------------------------------------------------------------------------|---------------------|----------------|
| <b>Age (for every 10 year increase)</b>                                                  | 1.65 [1.49-1.82]    | <0.001         |
| <b>Female sex</b>                                                                        | 1.49 [1.16-1.93]    | 0.002          |
| <b>Family history of HCM</b>                                                             | 1.13 [0.76-1.70]    | 0.5            |
| <b>Family history of SCD</b>                                                             | 1.06 [0.73-1.55]    | 0.8            |
| <b>History of SCD</b>                                                                    | 1.03 [0.53-2.01]    | 0.9            |
| <b>History of NSVT</b>                                                                   | 1.41 [0.86-2.30]    | 0.3            |
| <b>History of hypertension</b>                                                           | 1.93 [0.94-3.97]    | 0.3            |
| <b>History of diabetes mellitus</b>                                                      | 1.35 [0.90-2.01]    | 0.3            |
| <b>History of smoking</b>                                                                | 1.38 [0.96-1.97]    | 0.3            |
| <b>History of obstructive CAD</b>                                                        | 2.11 [1.58-2.82]    | <0.001         |
| <b>Syncope</b>                                                                           | 1.15 [0.77-1.73]    | 0.5            |
| <b>Medical therapy for symptomatic relief of LVOT obstruction</b>                        | 1.04 [0.79-1.38]    | 0.8            |
| <b>5-year European SCD risk score</b>                                                    | 1.01 [0.94-1.08]    | 0.8            |
| <b>Left ventricular ejection fraction</b>                                                | 1.04 [0.98-1.11]    | 0.8            |
| <b>Indexed left atrial diameter</b>                                                      | 1.06 [0.87-1.30]    | 0.6            |
| <b>Maximal basal interventricular septal thickness</b>                                   | 1.03 [0.78-1.36]    | 0.8            |
| <b>Resting LVOT gradient (for 10 mm Hg increase)</b>                                     | 1.01 [0.97-1.05]    | 0.5            |
| <b>Maximal LVOT gradient (for 10 mm Hg increase)</b>                                     | 1.03 [0.99-1.07]    | 0.2            |
| <b>Class I indication vs. earlier indication for surgical relief of LVOT obstruction</b> | 2.29 [1.73-3.03]    | <0.001         |
| <b>Type of surgical relief of LVOT obstruction</b>                                       |                     |                |
| <b>Myectomy</b>                                                                          | Reference           |                |
| <b>Myectomy + mitral/subvalvular surgery</b>                                             | 1.12 [0.56-2.23]    | 0.3            |
| <b>Myectomy + CABG</b>                                                                   | 1.14 [0.56-2.30]    | 0.3            |
| <b>Myectomy + CABG + mitral/subvalvular surgery</b>                                      | 1.37 [0.63-2.99]    | 0.4            |

HCM=hypertrophic cardiomyopathy, SCD=sudden cardiac death, CAD=coronary artery disease, LVOT=left ventricular outflow tract, CABG=coronary artery bypass grafting, HR=subhazard ratio, CI=confidence interval
